# Supplementary material for: Obesity, metabolic factors and risk of different histological types of lung cancer: A Mendelian randomization study
Source: PLOS journal article supplement (doi:10.1371/journal.pone.0177875), 2017-06-08

**S1 Fig - Power calculations for Mendelian randomization analyses on lung cancer using genetic instruments accounting for different proportion of phenotypic variance (15.0, 10.0, 5.0, 2.5 , and 1.0%).**

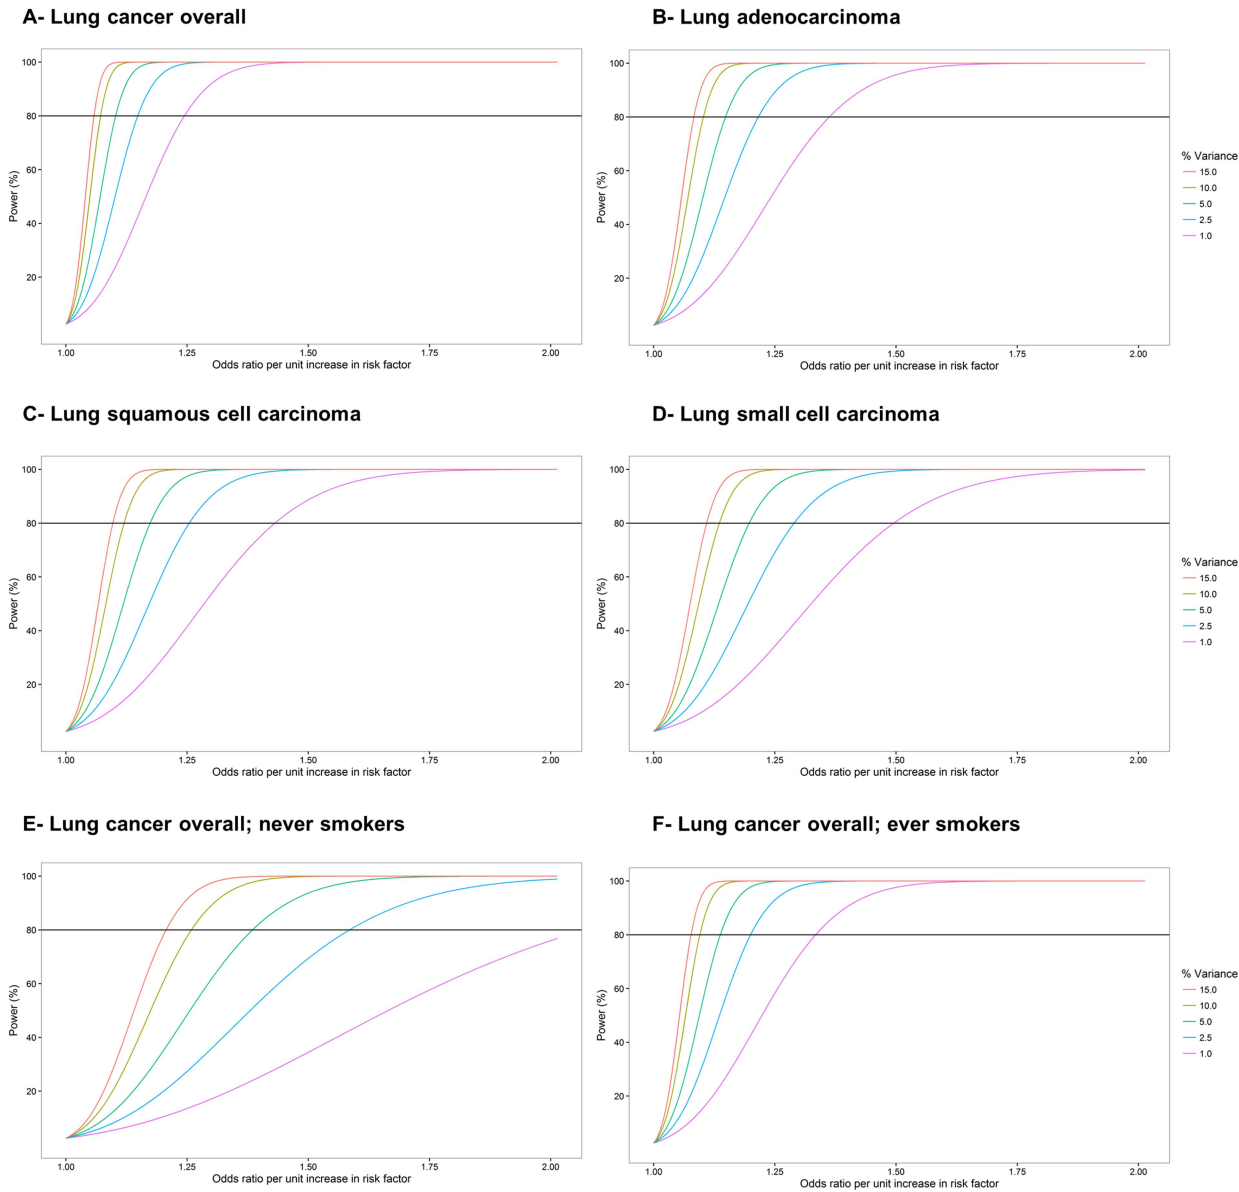

Supplement: S1 (10.1371/journal.pone.0177875.s001) [file journal.pone.0177875.s001]
