# Supplementary material for: Obesity, metabolic factors and risk of different histological types of lung cancer: A Mendelian randomization study
Source: PLOS journal article supplement (doi:10.1371/journal.pone.0177875), 2017-06-08

**S2 Fig - Forest plot of lung cancer risk for each SD increase of waist-to-hip ratio observed in a likelihood-based MR approach. 95%CI: 95% Confidence Interval; P: P value. I<sup>2</sup>: between-strata heterogeneity. PHet: P value of between-strata heterogeneity.**

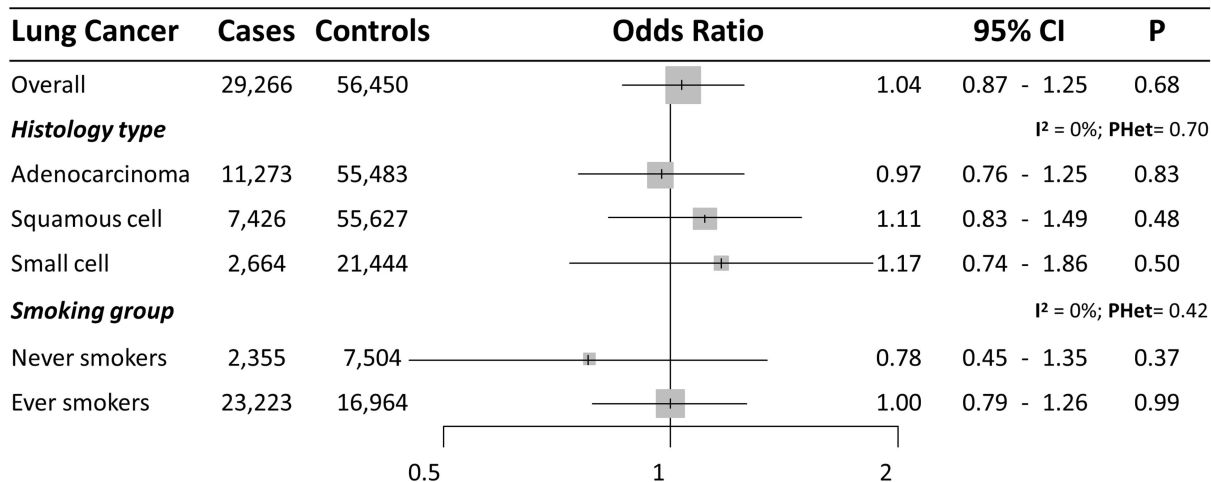

Supplement: S2 (10.1371/journal.pone.0177875.s002) [file journal.pone.0177875.s002]
