# Supplementary material for: Obesity, metabolic factors and risk of different histological types of lung cancer: A Mendelian randomization study
Source: PLOS journal article supplement (doi:10.1371/journal.pone.0177875), 2017-06-08

**S9 Fig - Forest plot of lung cancer risk for each SD increase in triglycerides observed in a likelihood-based MR approach using the instrument set of rare SNPs.** 95%CI: 95% Confidence Interval; P: P value.  $I^2$ : between-strata heterogeneity. PHet: P value of between-strata heterogeneity.

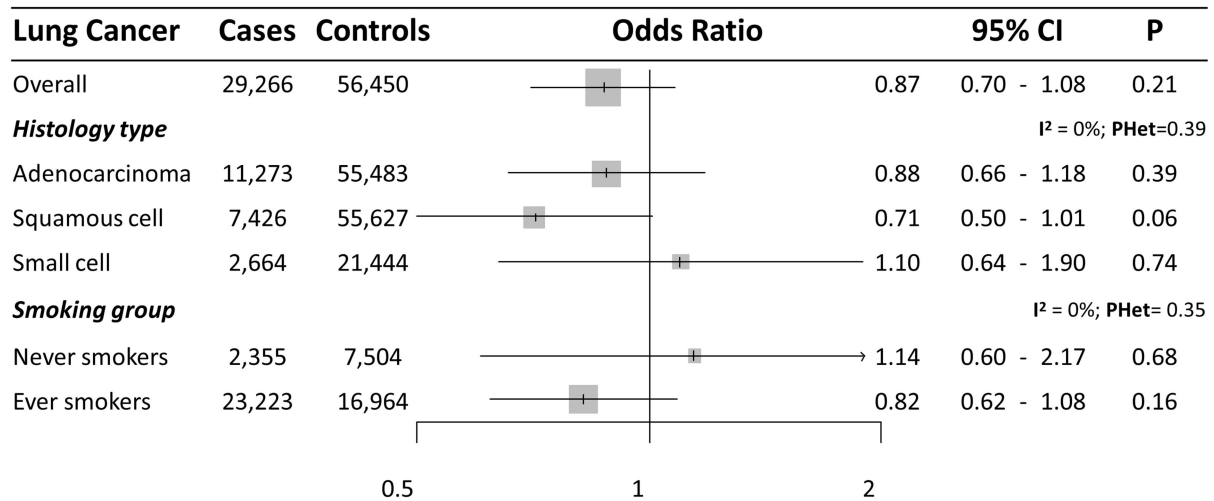

Supplement: S9 (10.1371/journal.pone.0177875.s009) [file journal.pone.0177875.s009]
