# Supplementary material for: Obesity, metabolic factors and risk of different histological types of lung cancer: A Mendelian randomization study
Source: PLOS journal article supplement (doi:10.1371/journal.pone.0177875), 2017-06-08

**S14 Fig - Funnel plots for the distribution of risk estimates of LDL instrumental rare SNPs along with MR causal effect lung cancer subtypes.** OR: Odds ratio; Int: Intercept; P: P value.

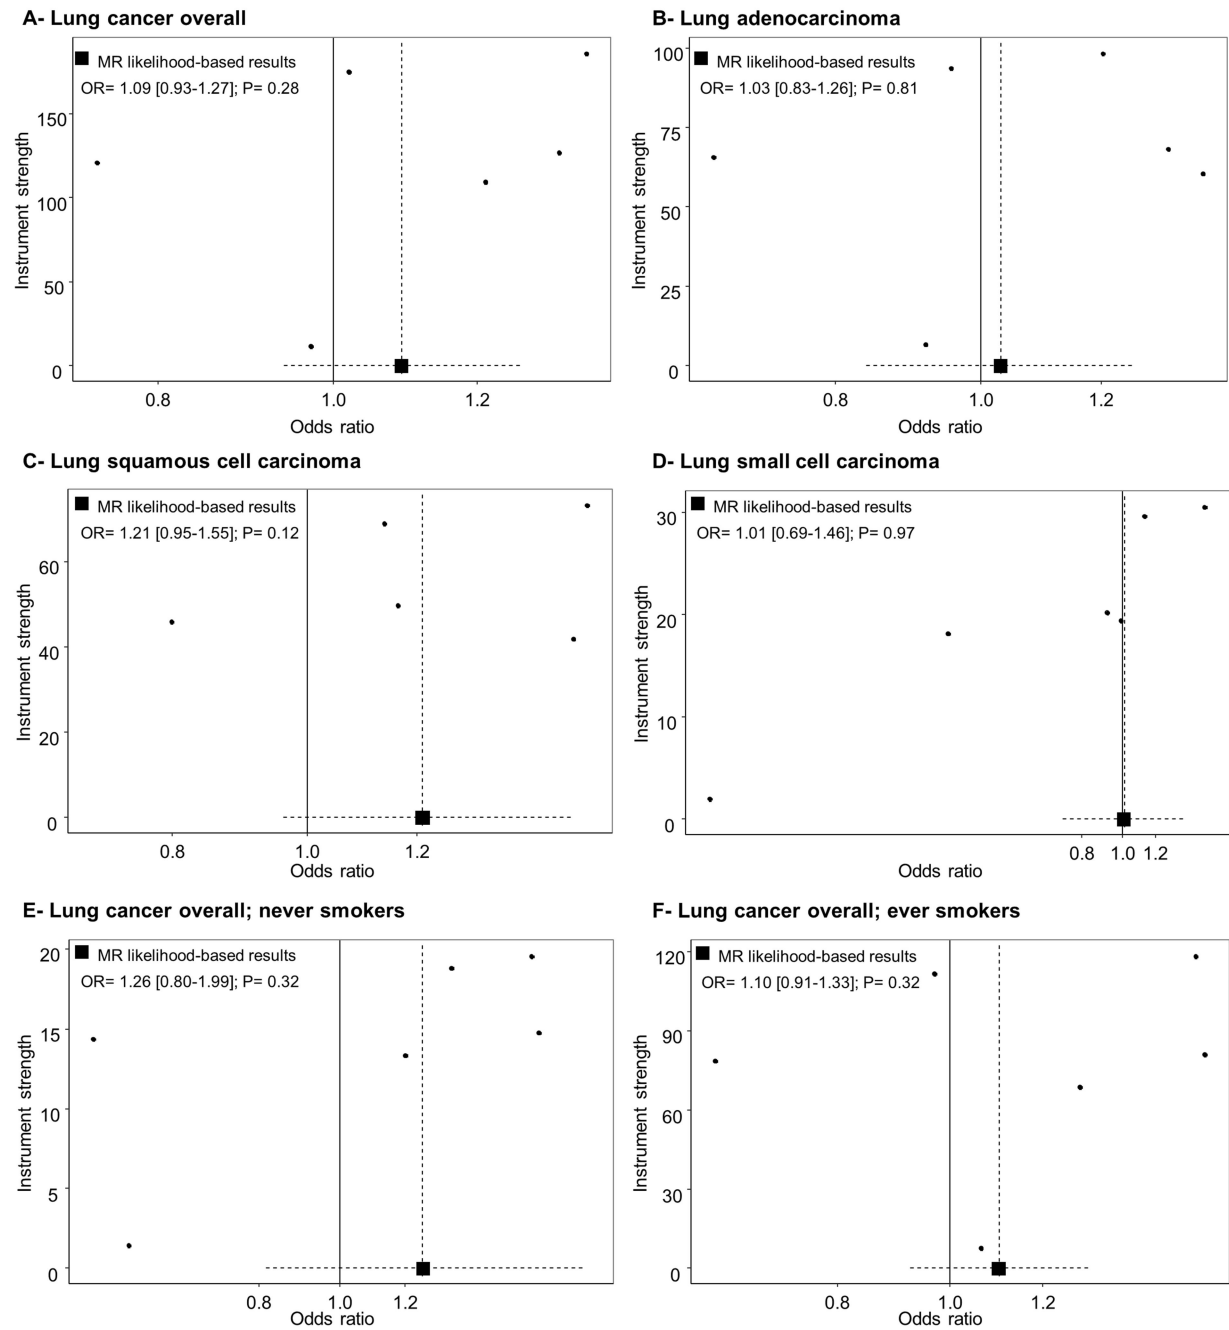

Supplement: S14 (10.1371/journal.pone.0177875.s014) [file journal.pone.0177875.s014]
